# Supplementary material for: Drug Signature-based Finding of Additional Clinical Use of LC28-0126 for Neutrophilic Bronchial Asthma
Source: PubMed Central journal article supplement (PMC4667219; doi:10.1038/srep17784), 2015-12-02

**Drug Signature-based Finding of Additional Clinical Use of LC28-0126 For  
Neutrophilic Bronchial Asthma**

**Authors:** Eunji Shin<sup>1</sup>, Yong Chul Lee<sup>2</sup>, So Ri Kim<sup>2</sup>, Soon Ha Kim<sup>1</sup>, Joonghoon Park<sup>1</sup>

**Affiliations:** <sup>1</sup>LG Life Sciences R&D Park, Daejeon, 305-380, Republic of Korea.

<sup>2</sup>Department of Internal Medicine, Research Center for Pulmonary Disorder, Chonbuk National University Medical School, Research Institute of Clinical Medicine of Chonbuk National University-Biomedical Research Institute of Chonbuk National University Hospital, Jeonju, 561-180, Republic of Korea

**Correspondence:** Joonghoon Park, LG Life Sciences R&D Park, Daejeon, 305-380, Republic of Korea. E-mail: joonghoon@lgls.com

## **Supplementary Information**

Supplementary Table S1. Individual cytokine profile before and after LC28-0126 infusion

Supplementary Table S2. Differentially expressed genes 6 hrs after LC28-0126 infusion

Supplementary Table S3. Full list of statistically significant connections of LC28-0126

Supplementary Table S4. Summary of 28-day repeat dose toxicity study of LC28-0126 in ICR mice

Supplementary Table S5. Summary of sample information, RNA quality control, and uses thereof

Supplementary Fig. S1. Preliminary microarray data analysis. (A) Inter-quartile range of signal intensities (B) Spearman rank correlation coefficient matrix among GeneChip (C) Spearman correlation coefficient scatter plot among GeneChip

Supplementary Table S1. Individual cytokine profile before and after LC28-0126 infusion

| Dose level of<br>LC28-0126<br>(mg/person) | Sample ID | Human inflammatory cytokine (pg/mL) |       |       |        |              |        | Human Th1/Th2/Th17 cytokine kit (pg/mL) |               |       |       |
|-------------------------------------------|-----------|-------------------------------------|-------|-------|--------|--------------|--------|-----------------------------------------|---------------|-------|-------|
|                                           |           | IL-12p70                            | TNF   | IL-10 | IL-6   | IL-1 $\beta$ | IL-8   | IL-17A                                  | IFN- $\gamma$ | IL-4  | IL-2  |
| 1                                         | R7201-0h  | 0.000                               | 0.000 | 2.166 | 0.555  | 0.000        | 7.615  | 19.432                                  | 0.000         | 0.000 | 2.816 |
|                                           | R7202-0h  | 0.771                               | 0.345 | 5.643 | 1.566  | 0.328        | 13.731 | 17.575                                  | 0.000         | 3.365 | 0.000 |
|                                           | R7204-0h  | 1.897                               | 0.000 | 4.341 | 1.148  | 1.062        | 6.081  | 9.351                                   | 0.000         | 2.137 | 0.000 |
|                                           | R7206-0h  | 0.683                               | 0.441 | 4.455 | 3.223  | 0.617        | 2.733  | 14.739                                  | 0.000         | 1.207 | 0.000 |
|                                           | R7208-0h  | 0.905                               | 0.945 | 4.341 | 0.000  | 1.176        | 8.412  | 0.690                                   | 0.000         | 0.000 | 0.669 |
|                                           | R7201-6h  | 0.000                               | 0.000 | 2.602 | 0.471  | 0.000        | 5.417  | 0.000                                   | 0.000         | 0.000 | 0.930 |
|                                           | R7202-6h  | 1.750                               | 0.408 | 3.534 | 2.525  | 2.634        | 8.795  | 5.748                                   | 0.000         | 1.305 | 2.440 |
|                                           | R7204-6h  | 1.799                               | 0.000 | 4.680 | 1.614  | 0.000        | 2.837  | 12.324                                  | 0.000         | 0.000 | 3.290 |
|                                           | R7206-6h  | 0.301                               | 0.441 | 3.217 | 1.402  | 0.838        | 3.754  | 4.140                                   | 2.700         | 0.000 | 2.440 |
| R7208-6h                                  | 1.087     | 0.000                               | 3.217 | 0.990 | 0.000  | 5.822        | 11.834 | 0.000                                   | 2.386         | 2.110 |       |
| 3                                         | R1201-0h  | 0.000                               | 0.000 | 2.166 | 0.000  | 0.187        | 12.300 | 39.726                                  | 0.000         | 0.000 | 1.421 |
|                                           | R1202-0h  | 1.604                               | 0.408 | 4.455 | 1.263  | 1.637        | 9.834  | 25.749                                  | 2.700         | 0.000 | 0.866 |
|                                           | R1203-0h  | 0.511                               | 0.000 | 5.606 | 3.918  | 0.436        | 11.826 | 0.000                                   | 0.000         | 0.000 | 0.000 |
|                                           | R1205-0h  | 0.426                               | 0.038 | 3.690 | 2.074  | 0.617        | 9.487  | 18.971                                  | 1.058         | 0.000 | 0.000 |
|                                           | R1208-0h  | 0.000                               | 0.807 | 3.884 | 1.496  | 2.270        | 9.564  | 9.351                                   | 0.000         | 0.000 | 0.087 |
|                                           | R1201-6h  | 1.799                               | 1.786 | 2.029 | 0.000  | 0.000        | 9.332  | 0.000                                   | 0.000         | 0.000 | 1.302 |
|                                           | R1202-6h  | 0.000                               | 1.121 | 4.266 | 1.566  | 1.521        | 4.616  | 5.748                                   | 0.000         | 0.979 | 0.000 |
|                                           | R1203-6h  | 0.000                               | 0.067 | 5.459 | 1.638  | 1.405        | 19.379 | 13.779                                  | 1.359         | 0.000 | 0.000 |
|                                           | R1205-6h  | 0.060                               | 0.604 | 4.455 | 1.194  | 2.472        | 10.494 | 9.351                                   | 0.000         | 0.000 | 0.243 |
| R1208-6h                                  | 1.604     | 0.000                               | 4.492 | 1.425 | 0.400  | 8.680        | 18.042 | 0.000                                   | 0.000         | 1.481 |       |
| 10                                        | R2201-0h  | 0.000                               | 0.000 | 3.573 | 0.000  | 0.000        | 1.871  | 20.809                                  | 0.000         | 0.000 | 0.318 |
|                                           | R2202-0h  | 0.426                               | 0.000 | 6.591 | 1.976  | 0.000        | 4.544  | 23.075                                  | 5.353         | 3.212 | 2.110 |
|                                           | R2203-0h  | 0.640                               | 0.067 | 3.056 | 1.638  | 0.328        | 3.047  | 5.748                                   | 0.000         | 0.000 | 0.930 |
|                                           | R2205-0h  | 0.000                               | 0.000 | 3.573 | 0.946  | 1.559        | 5.307  | 13.296                                  | 0.000         | 0.000 | 1.942 |
|                                           | R2206-0h  | 1.604                               | 0.000 | 4.605 | 1.758  | 0.436        | 6.601  | 2.470                                   | 1.860         | 2.325 | 0.463 |
|                                           | R2201-6h  | 0.000                               | 0.000 | 1.936 | 0.000  | 1.290        | 1.430  | 16.165                                  | 1.359         | 0.000 | 0.000 |
|                                           | R2202-6h  | 0.511                               | 0.506 | 5.164 | 1.976  | 0.653        | 4.870  | 15.216                                  | 1.058         | 2.006 | 1.119 |
|                                           | R2203-6h  | 0.000                               | 1.229 | 3.884 | 1.125  | 0.949        | 2.942  | 0.000                                   | 0.000         | 0.000 | 2.330 |
|                                           | R2205-6h  | 0.000                               | 0.313 | 3.690 | 1.013  | 0.000        | 5.307  | 10.848                                  | 2.296         | 2.201 | 3.081 |
| R2206-6h                                  | 0.771     | 0.506                               | 3.884 | 0.534 | 0.987  | 4.943        | 18.042 | 0.000                                   | 2.732         | 2.494 |       |
| 25                                        | R3201-0h  | 0.000                               | 0.000 | 1.793 | 0.619  | 0.000        | 1.028  | 0.000                                   | 0.000         | 0.000 | 0.000 |
|                                           | R3203-0h  | 2.196                               | 0.313 | 7.782 | 10.031 | 1.637        | 4.544  | 16.637                                  | 0.000         | 0.000 | 2.656 |
|                                           | R3205-0h  | 1.225                               | 1.157 | 3.297 | 0.000  | 1.328        | 5.307  | 0.000                                   | 0.000         | 2.006 | 1.481 |
|                                           | R3207-0h  | 0.683                               | 1.485 | 5.164 | 1.686  | 2.757        | 3.329  | 4.681                                   | 0.000         | 2.006 | 0.000 |
|                                           | R3208-0h  | 0.060                               | 0.604 | 4.567 | 0.347  | 1.521        | 4.616  | 24.418                                  | 0.000         | 0.000 | 0.000 |
|                                           | R3201-6h  | 0.000                               | 0.000 | 3.097 | 0.619  | 0.000        | 1.161  | 18.042                                  | 0.000         | 0.000 | 0.000 |
|                                           | R3203-6h  | 1.653                               | 1.448 | 5.127 | 1.614  | 1.100        | 4.652  | 24.863                                  | 3.331         | 0.000 | 0.669 |
|                                           | R3205-6h  | 0.683                               | 1.265 | 3.922 | 1.217  | 0.544        | 2.698  | 2.470                                   | 0.000         | 0.000 | 0.533 |
|                                           | R3207-6h  | 1.179                               | 1.672 | 2.474 | 0.946  | 2.513        | 4.833  | 12.324                                  | 1.058         | 1.305 | 1.481 |
| R3208-6h                                  | 0.000     | 1.560                               | 4.717 | 0.597 | 0.222  | 7.426        | 25.749 | 0.000                                   | 0.000         | 2.975 |       |

Supplementary Table S2. Differentially expressed genes 6 hrs after LC28-0126 infusion

| Probe ID     | Gene Symbol  | Gene Name                                                                                                                 | Protein Function           | Fold change (6 hr/0 hr) at each dose level (mg/person) of LC28-0126 |       |       |       |
|--------------|--------------|---------------------------------------------------------------------------------------------------------------------------|----------------------------|---------------------------------------------------------------------|-------|-------|-------|
|              |              |                                                                                                                           |                            | 1                                                                   | 3     | 10    | 25    |
| 238692_at    | BTBD11       | BTB (POZ) domain containing 11, BTBD11                                                                                    | Generic binding protein    | -1.05                                                               | 2.91  | 1.18  | 1.04  |
| 1554606_at   | CEP120       | centrosomal protein 120kDa, CEP120                                                                                        | Generic binding protein    | -1.17                                                               | 2.19  | 1.05  | 1.27  |
| 235918_x_at  | CEP97        | centrosomal protein 97kDa, CEP97                                                                                          | Generic binding protein    | -1.74                                                               | 1.18  | 1.10  | 2.00  |
| 231918_s_at  | GFM2         | G elongation factor, mitochondrial 2, GFM2                                                                                | Generic binding protein    | 1.06                                                                | 2.00  | 1.10  | 1.18  |
| 229970_at    | KBTBD7       | ---                                                                                                                       | Generic binding protein    | 1.10                                                                | 2.08  | 1.24  | 1.97  |
| 231875_at    | KIF21A       | kinesin family member 21A, KIF21A                                                                                         | Generic binding protein    | -1.38                                                               | 1.22  | 1.01  | 2.01  |
| 233085_s_at  | NABP1        | oligonucleotide/oligosaccharide-binding fold containing 2A, OBFC2A                                                        | Generic binding protein    | -1.05                                                               | 2.12  | 1.45  | 1.30  |
| 223315_at    | NTN4         | netrin 4, NTN4                                                                                                            | Generic binding protein    | 1.28                                                                | 1.47  | 1.21  | 2.06  |
| 202861_at    | PER1         | period homolog 1 (Drosophila), PER1                                                                                       | Generic binding protein    | -1.43                                                               | -1.77 | -2.29 | -2.10 |
| 36829_at     | PER1         | period homolog 1 (Drosophila), PER1                                                                                       | Generic binding protein    | -1.30                                                               | -1.48 | -2.03 | -1.68 |
| 204286_s_at  | PMAIP1       | phorbol-12-myristate-13-acetate-induced protein 1, PMAIP1                                                                 | Generic binding protein    | 1.27                                                                | 2.11  | 1.49  | 1.18  |
| 213430_at    | RUFY3        | RUN and FYVE domain containing 3, RUFY3                                                                                   | Generic binding protein    | -1.19                                                               | 1.42  | 1.37  | 2.07  |
| 232636_at    | SLITRK4      | SLIT and NTRK-like family, member 4, SLITRK4                                                                              | Generic binding protein    | 1.48                                                                | 2.01  | 1.67  | 1.20  |
| 219583_s_at  | SPATA7       | spermatogenesis associated 7, SPATA7                                                                                      | Generic binding protein    | 1.05                                                                | 2.00  | 1.69  | 1.20  |
| 226837_at    | SPRED1       | sprouty-related, EVH1 domain containing 1, SPRED1                                                                         | Generic binding protein    | 1.30                                                                | 2.34  | 1.47  | 1.62  |
| 223511_at    | SPRTN        | chromosome 1 open reading frame 124, C1orf124                                                                             | Generic binding protein    | -1.21                                                               | 2.18  | 1.31  | 1.29  |
| 235653_s_at  | THAP6        | THAP domain containing 6, THAP6                                                                                           | Generic binding protein    | 1.44                                                                | -1.15 | 1.28  | 2.03  |
| 219330_at    | VANGL1       | vang-like 1 (van gogh, Drosophila), VANGL1                                                                                | Generic binding protein    | 1.16                                                                | 1.47  | -1.00 | 2.03  |
| 235625_at    | VPS41        | vacuolar protein sorting 41 homolog (S. cerevisiae), VPS41                                                                | Generic binding protein    | -1.03                                                               | 2.12  | 1.44  | 1.36  |
| 206098_at    | ZBTB6        | zinc finger and BTB domain containing 6, ZBTB6                                                                            | Generic binding protein    | -1.35                                                               | 2.06  | 1.61  | 1.48  |
| 1558700_s_at | ZNF260       | zinc finger protein 260, ZNF260                                                                                           | Generic binding protein    | -1.32                                                               | 2.43  | 1.16  | 1.69  |
| 204567_at    | ABCG1        | ATP-binding cassette, sub-family G (WHITE), member 1, ABCG1                                                               | Generic channel            | 1.20                                                                | 1.72  | 1.47  | 2.02  |
| 206233_at    | B4GALT6      | UDP-Gal:betaGlcNAc beta 1,4-galactosyltransferase, polypeptide 6, B4GALT6                                                 | Generic enzyme             | -1.43                                                               | 2.09  | 1.02  | 1.31  |
| 202620_s_at  | PLOD2        | procollagen-lysine, 2-oxoglutarate 5-dioxygenase 2, PLOD2                                                                 | Generic enzyme             | 1.41                                                                | 1.61  | 2.02  | 1.11  |
| 232020_at    | SMURF2       | SMAD specific E3 ubiquitin protein ligase 2, SMURF2                                                                       | Generic enzyme             | -1.25                                                               | 2.20  | 1.04  | 1.59  |
| 235334_at    | ST6GALNAC3   | ST6 (alpha-N-acetyl-neuraminyl-2,3-beta-galactosyl-1,3)-N-acetylgalactosaminide alpha-2,6-sialyltransferase 3, ST6GALNAC3 | Generic enzyme             | 1.28                                                                | 2.00  | 1.13  | 1.03  |
| 1556185_a_at | STEAP4       | STEAP family member 4, STEAP4                                                                                             | Generic enzyme             | 1.41                                                                | 2.56  | 2.01  | 1.15  |
| 210145_at    | PLA2G4A      | phospholipase A2, group IVA (cytosolic, calcium-dependent), PLA2G4A                                                       | Generic phospholipase      | 1.34                                                                | 2.40  | 1.27  | 1.19  |
| 229309_at    | ADRB1        | adrenergic, beta-1-, receptor, ADRB1                                                                                      | Generic receptor           | 1.54                                                                | 1.66  | 2.46  | 2.19  |
| 242197_x_at  | CD36         | CD36 molecule (thrombospondin receptor), CD36                                                                             | Generic receptor           | 1.71                                                                | 1.42  | 2.08  | 1.63  |
| 235401_s_at  | FCRLA        | Fc receptor-like A, FCRLA                                                                                                 | Generic receptor           | -1.25                                                               | 2.22  | 1.20  | 1.30  |
| 206995_x_at  | SCARF1       | scavenger receptor class F, member 1, SCARF1                                                                              | Generic receptor           | 1.06                                                                | 2.12  | 1.04  | 1.38  |
| 202887_s_at  | DDIT4        | DNA-damage-inducible transcript 4, DDIT4                                                                                  | Protein                    | -1.52                                                               | -1.65 | -2.44 | -1.37 |
| 219872_at    | FAM198B      | family with sequence similarity 198, member B, FAM198B                                                                    | Protein                    | 1.41                                                                | 2.07  | 1.13  | 1.17  |
| 213524_s_at  | G0S2         | G0/G1switch 2, G0S2                                                                                                       | Protein                    | -1.57                                                               | -3.26 | -1.44 | -2.05 |
| 225188_at    | RAPH1        | Ras association (RalGDS/AF-6) and pleckstrin homology domains 1, RAPH1                                                    | Protein                    | 1.25                                                                | 1.70  | 2.05  | 2.05  |
| 225189_s_at  | RAPH1        | Ras association (RalGDS/AF-6) and pleckstrin homology domains 1, RAPH1                                                    | Protein                    | 1.61                                                                | 2.29  | 1.65  | 1.75  |
| 221596_s_at  | RBM48        | chromosome 7 open reading frame 64, C7orf64                                                                               | Protein                    | -1.29                                                               | 2.07  | 1.40  | 1.42  |
| 217104_at    | ST20         | suppressor of tumorigenicity 20, ST20                                                                                     | Protein                    | 1.14                                                                | 2.02  | 1.48  | 1.26  |
| 225207_at    | PDK4         | pyruvate dehydrogenase kinase, isozyme 4, PDK4                                                                            | Protein kinase             | -2.71                                                               | -3.72 | -2.99 | -3.83 |
| 204794_at    | DUSP2        | dual specificity phosphatase 2, DUSP2                                                                                     | Protein phosphatase        | -1.38                                                               | -2.05 | -1.74 | -1.19 |
| 219787_s_at  | ECT2         | epithelial cell transforming sequence 2 oncogene, ECT2                                                                    | Regulators (GDI, GAP, GEF) | -1.06                                                               | 1.53  | 1.30  | 2.28  |
| 226122_at    | PLEKHG1      | pleckstrin homology domain containing, family G (with RhoGef domain) member 1, PLEKHG1                                    | Regulators (GDI, GAP, GEF) | -1.03                                                               | 2.20  | 1.04  | 1.06  |
| 204761_at    | USP6NL       | USP6 N-terminal like, USP6NL                                                                                              | Regulators (GDI, GAP, GEF) | -1.15                                                               | 2.08  | 1.01  | 1.27  |
| 203840_at    | BLZF1        | basic leucine zipper nuclear factor 1, BLZF1                                                                              | Transcription factor       | -1.04                                                               | 2.05  | 1.29  | 1.35  |
| 230056_at    | BPTF         | bromodomain PHD finger transcription factor, BPTF                                                                         | Transcription factor       | -1.19                                                               | 1.75  | 1.05  | 2.09  |
| 204621_s_at  | NR4A2        | nuclear receptor subfamily 4, group A, member 2, NR4A2                                                                    | Transcription factor       | -1.43                                                               | -2.04 | -1.50 | -1.97 |
| 204622_x_at  | NR4A2        | nuclear receptor subfamily 4, group A, member 2, NR4A2                                                                    | Transcription factor       | -1.48                                                               | -2.05 | -1.32 | -1.72 |
| 216248_s_at  | NR4A2        | nuclear receptor subfamily 4, group A, member 2, NR4A2                                                                    | Transcription factor       | -1.81                                                               | -2.09 | -1.55 | -1.76 |
| 237388_at    | ---          | ---                                                                                                                       | #N/A                       | -2.12                                                               | -1.15 | 1.27  | -1.07 |
| 238913_at    | ---          | ---                                                                                                                       | #N/A                       | -2.01                                                               | -1.14 | -1.29 | -1.11 |
| 242751_at    | ---          | ---                                                                                                                       | #N/A                       | -2.09                                                               | 1.02  | -1.24 | -1.16 |
| 243915_at    | ---          | ---                                                                                                                       | #N/A                       | -2.01                                                               | -1.02 | 1.14  | -1.04 |
| 227004_at    | ---          | ---                                                                                                                       | #N/A                       | 2.02                                                                | 2.02  | 1.42  | 1.20  |
| 230399_at    | ---          | ---                                                                                                                       | #N/A                       | -1.28                                                               | 2.09  | 1.04  | 1.23  |
| 232958_at    | ---          | ---                                                                                                                       | #N/A                       | -1.02                                                               | 2.11  | 1.40  | 1.70  |
| 235739_at    | ---          | ---                                                                                                                       | #N/A                       | -1.05                                                               | -2.23 | -1.05 | -1.20 |
| 236907_at    | ---          | ---                                                                                                                       | #N/A                       | -1.76                                                               | -2.06 | 1.08  | -1.16 |
| 241982_at    | ---          | ---                                                                                                                       | #N/A                       | -1.17                                                               | -2.26 | 1.18  | -1.03 |
| 229804_x_at  | CBWD         | COBW domain containing                                                                                                    | #N/A                       | -1.05                                                               | 2.08  | 1.64  | 1.57  |
| 222924_at    | LOC100287789 | sarcolemma associated protein, SLMAP                                                                                      | #N/A                       | -1.41                                                               | 2.11  | 1.16  | 1.07  |
| 242904_x_at  | LOC100653229 | ---                                                                                                                       | #N/A                       | -1.10                                                               | -2.04 | -1.58 | -1.22 |
| 1556842_at   | LOC286087    | ---                                                                                                                       | #N/A                       | -1.55                                                               | -1.19 | -2.04 | 1.28  |

Supplementary Table S3. Full list of statistically significant connections of LC28-0126

| ATC     | ATC classification                                               | CMAP instance       | Concentration | Cell line | Set size | Query length | Score        | P value | Standardized score |
|---------|------------------------------------------------------------------|---------------------|---------------|-----------|----------|--------------|--------------|---------|--------------------|
| R03DA01 | DRUGS FOR OBSTRUCTIVE AIRWAY DISEASES                            | Dyphilline          | 15.8 uM       | MCF7      | 2        | 24           | 0.372823264  | 0.0001  | 4.118474448        |
| N07CA01 | OTHER NERVOUS SYSTEM DRUGS                                       | Betahistine         | 17.2 uM       | PC3       | 1        | 24           | 0.448413144  | 4E-05   | 3.812489077        |
| G04AB03 | UROLOGICALS                                                      | Pipemidic Acid      | 13.2 uM       | MCF7      | 1        | 24           | 0.400491286  | 0.00034 | 3.405048832        |
| #N/A    |                                                                  | 5186223             | 12 uM         | MCF7      | 1        | 24           | 0.391361531  | 0.00048 | 3.327426017        |
| C01BC04 | CARDIAC THERAPY                                                  | Flecainide          | 8.4 uM        | PC3       | 2        | 24           | 0.19952443   | 0.001   | 3.278726625        |
| #N/A    |                                                                  | Hemicholinium       | 7 uM          | PC3       | 1        | 24           | 0.382909024  | 0.00068 | 3.255561288        |
| #N/A    |                                                                  | Yohimbic Acid       | 11.2 uM       | MCF7      | 1        | 24           | 0.373771786  | 0.00118 | 3.177874848        |
| #N/A    |                                                                  | Estropipate         | 9.2 uM        | MCF7      | 2        | 24           | 0.333840334  | 0.0008  | 3.155511554        |
| C01BD01 | CARDIAC THERAPY                                                  | Amiodarone          | 5.8 uM        | PC3       | 1        | 24           | -0.370099305 | 0.00126 | -3.146650753       |
| P02CE01 | ANTHELMINTICS                                                    | Levamisole          | 16.6 uM       | HL60      | 1        | 24           | -0.371212461 | 0.00124 | -3.15611501        |
| #N/A    |                                                                  | Pnu-0230031         | 10 uM         | MCF7      | 2        | 24           | -0.251049548 | 0.0008  | -3.161011472       |
| C02AA02 | ANTIHYPERTENSIVES                                                | Reserpine           | 6.6 uM        | MCF7      | 1        | 24           | -0.372059957 | 0.00122 | -3.163320571       |
| #N/A    |                                                                  | Luteolin            | 14 uM         | MCF7      | 2        | 24           | -0.346420874 | 0.001   | -3.177249855       |
| R06AX16 | ANTIHISTAMINES FOR SYSTEMIC USE                                  | Deptropine          | 7.6 uM        | MCF7      | 2        | 24           | -0.319828593 | 0.0006  | -3.189901938       |
| D07AC07 | CORTICOSTEROIDS, DERMATOLOGICAL PREPARATIONS                     | Fludrocortidone     | 9.2 uM        | HL60      | 1        | 24           | -0.375468648 | 0.00112 | -3.192301876       |
| J01FA05 | ANTIBACTERIALS FOR SYSTEMIC USE                                  | Oleandomycin        | 5 uM          | PC3       | 2        | 24           | -0.280896175 | 0.0008  | -3.1933171         |
| N05AF05 | PSYCHOLEPTICS                                                    | Zuclopenthixol      | 9.2 uM        | PC3       | 1        | 24           | -0.377571485 | 0.00104 | -3.210180573       |
| #N/A    |                                                                  | Clorgiline          | 13 uM         | MCF7      | 2        | 24           | -0.360741306 | 0.001   | -3.221555282       |
| N05AF01 | PSYCHOLEPTICS                                                    | Flupentixol         | 7.8 uM        | PC3       | 1        | 24           | -0.380484401 | 0.0009  | -3.234946705       |
| H02AB12 | CORTICOSTEROIDS FOR SYSTEMIC USE                                 | Rimexolone          | 10.8 uM       | MCF7      | 2        | 24           | -0.326228775 | 0.0012  | -3.246051683       |
| #N/A    |                                                                  | Prestwick-1100      | 9 uM          | PC3       | 2        | 24           | -0.278550128 | 0.0008  | -3.267134262       |
| D07AC17 | CORTICOSTEROIDS, DERMATOLOGICAL PREPARATIONS                     | Fluticasone         | 8 uM          | HL60      | 1        | 24           | -0.384783617 | 0.00084 | -3.271499415       |
| #N/A    |                                                                  | Helveticoside       | 7.4 uM        | MCF7      | 3        | 24           | -0.303031153 | 0.0012  | -3.277473029       |
| #N/A    |                                                                  | 0179445-0000        | 10 uM         | PC3       | 2        | 24           | -0.322285956 | 0.0006  | -3.278298985       |
| D04AB05 | ANTIPRURITICS, INCL. ANTIHISTAMINES, ANESTHETICS, ETC.           | Quinisoquine        | 13 uM         | MCF7      | 2        | 24           | -0.326520628 | 0.0001  | -3.280550087       |
| #N/A    |                                                                  | Harman              | 18.2 uM       | MCF7      | 2        | 24           | -0.334290274 | 0.001   | -3.285004179       |
| #N/A    |                                                                  | Parbendazole        | 16.2 uM       | PC3       | 2        | 24           | -0.151229336 | 0.0012  | -3.29131816        |
| #N/A    |                                                                  | Blebbistatin        | 17 uM         | MCF7      | 2        | 24           | -0.313813805 | 0.001   | -3.3174087         |
| N05AD06 | PSYCHOLEPTICS                                                    | Bromperidol         | 9.6 uM        | MCF7      | 2        | 24           | -0.357286779 | 0.0006  | -3.32336444        |
| #N/A    |                                                                  | Verteporfin         | 2.8 uM        | MCF7      | 2        | 24           | -0.342555695 | 0.0006  | -3.335359781       |
| #N/A    |                                                                  | Suloctidil          | 11.8 uM       | MCF7      | 2        | 24           | -0.289272912 | 0.0008  | -3.342506094       |
| A03FA02 | DRUGS FOR FUNCTIONAL GASTROINTESTINAL DISORDERS                  | Cisapride           | 8.6 uM        | MCF7      | 2        | 24           | -0.293348562 | 0.001   | -3.345614747       |
| A03FA01 | DRUGS FOR FUNCTIONAL GASTROINTESTINAL DISORDERS                  | Metoclopramide      | 11.8 uM       | HL60      | 1        | 24           | -0.393664549 | 0.00062 | -3.34700669        |
| #N/A    |                                                                  | DI-Alpha Tocopherol | 9.2 uM        | PC3       | 1        | 24           | -0.393902147 | 0.00062 | -3.349026792       |
| C01AB01 | CARDIAC THERAPY                                                  | Proscillaridin      | 7.6 uM        | HL60      | 1        | 24           | -0.396472697 | 0.00056 | -3.370882068       |
| #N/A    |                                                                  | Prestwick-559       | 8.2 uM        | MCF7      | 2        | 24           | -0.367920698 | 0.0002  | -3.381717199       |
| S01BA08 | OPHTHALMOLOGICALS                                                | Medrysone           | 11.6 uM       | MCF7      | 3        | 24           | -0.344465523 | 0.0008  | -3.396629515       |
| C02AA01 | ANTIHYPERTENSIVES                                                | Rescinnamine        | 6.4 uM        | MCF7      | 2        | 24           | -0.311936406 | 0.0008  | -3.45645094        |
| #N/A    |                                                                  | Tonzonium Bromide   | 6.8 uM        | PC3       | 1        | 24           | -0.408438662 | 0.00034 | -3.472618855       |
| N05AC02 | PSYCHOLEPTICS                                                    | Thioridazine        | 10 uM         | MCF7      | 8        | 24           | -0.259080879 | 0.0001  | -3.476683635       |
| A02BX06 | DRUGS FOR ACID RELATED DISORDERS                                 | Proglumide          | 12 uM         | PC3       | 2        | 24           | -0.310273219 | 0.0004  | -3.489382892       |
| #N/A    |                                                                  | Resveratrol         | 17.6 uM       | MCF7      | 2        | 24           | -0.345473288 | 0.0004  | -3.492215686       |
| #N/A    |                                                                  | 0175029-0000        | 1 uM          | PC3       | 2        | 24           | -0.312709068 | 0.0001  | -3.507815509       |
| #N/A    |                                                                  | Thioguanosine       | 12.6 uM       | MCF7      | 2        | 24           | -0.339074976 | 0.0001  | -3.508472723       |
| P02DA01 | ANTHELMINTICS                                                    | Niclosamide         | 12.2 uM       | MCF7      | 1        | 24           | -0.414758398 | 0.00022 | -3.526350386       |
| #N/A    |                                                                  | 5248896             | 11 uM         | MCF7      | 2        | 24           | -0.34879592  | 0.0002  | -3.530753994       |
| C03DA01 | DIURETICS                                                        | Spirolactone        | 9.6 uM        | MCF7      | 3        | 24           | -0.2244872   | 0.0002  | -3.538286727       |
| J01EA01 | ANTIBACTERIALS FOR SYSTEMIC USE                                  | Trimethoprim        | 13.8 uM       | MCF7      | 2        | 24           | -0.328053791 | 0.0006  | -3.596271582       |
| J01XD02 | ANTIBACTERIALS FOR SYSTEMIC USE                                  | Tinidazole          | 16.2 uM       | PC3       | 2        | 24           | -0.314020534 | 0.0001  | -3.635887299       |
| C08CA02 | CALCIUM CHANNEL BLOCKERS                                         | Felodipine          | 10 uM         | MCF7      | 3        | 24           | -0.244933734 | 0.0001  | -3.646353775       |
| #N/A    |                                                                  | Celastrol           | 2.5 uM        | MCF7      | 1        | 24           | -0.429745789 | 0.00014 | -3.653775871       |
| N04AA04 | ANTI-PARKINSON DRUGS                                             | Procyclidine        | 12.4 uM       | MCF7      | 2        | 24           | -0.343381676 | 0.0004  | -3.660885027       |
| #N/A    |                                                                  | Prestwick-674       | 14.4 uM       | MCF7      | 3        | 24           | -0.386607074 | 0.0001  | -3.666268753       |
| S01FA06 | OPHTHALMOLOGICALS                                                | Tropicamide         | 14 uM         | MCF7      | 3        | 24           | -0.283183291 | 0.0002  | -3.675968527       |
| #N/A    |                                                                  | Pararosaniline      | 10 uM         | MCF7      | 1        | 24           | -0.439466733 | 0.00006 | -3.736425081       |
| #N/A    |                                                                  | Epiandrosterone     | 13.8 uM       | HL60      | 1        | 24           | -0.440772587 | 0.00006 | -3.747527688       |
| #N/A    |                                                                  | Resveratrol         | 10 uM         | MCF7      | 2        | 24           | -0.348536807 | 0.0006  | -3.793269374       |
| B02BA02 | ANTHEMORRHAGICS                                                  | Menadione           | 23.2 uM       | PC3       | 1        | 24           | -0.447982848 | 0.00006 | -3.808830624       |
| C04AX02 | PERIPHERAL VASODILATORS                                          | Phenoxybenzamine    | 11.8 uM       | MCF7      | 3        | 24           | -0.397387543 | 0.0001  | -3.815632773       |
| V03AC01 | ALL OTHER THERAPEUTIC PRODUCTS                                   | Deferoxamine        | 6 uM          | MCF7      | 3        | 24           | -0.341247658 | 0.0001  | -3.948218688       |
| C05AA11 | VASOPROTECTIVES                                                  | Fluocinonide        | 8 uM          | MCF7      | 3        | 24           | -0.369289226 | 0.0001  | -3.96157693        |
| R05DB21 | COUGH AND COLD PREPARATIONS                                      | Cloperastine        | 11 uM         | MCF7      | 3        | 24           | -0.252252505 | 0.0002  | -3.963502388       |
| #N/A    |                                                                  | Sirolimus           | 0.1 uM        | MCF7      | 2        | 24           | -0.407839054 | 0.0001  | -4.049208587       |
| C01BC03 | CARDIAC THERAPY                                                  | Propafenone         | 10.6 uM       | MCF7      | 2        | 24           | -0.383258873 | 0.0001  | -4.079682355       |
| A07EA07 | ANTIDIARRHEALS, INTESTINAL ANTIINFLAMMATORY/ANTIINFECTIVE AGENTS | Beclometasone       | 7.6 uM        | MCF7      | 1        | 24           | -0.496688593 | 0.00001 | -4.222935615       |

Supplementary Table S4. Summary of 28-day repeat dose toxicity study of LC28-0126 in ICR mice

|                                          |           | Male  |       |       | Female |       |       |
|------------------------------------------|-----------|-------|-------|-------|--------|-------|-------|
| Dose (mg/kg/day)                         |           | 0     | 40    | 80    | 0      | 40    | 80    |
| No. of animals                           |           | 10    | 10    | 10    | 10     | 10    | 10    |
| Bodyweight at 4-week (g)                 | Mean      | 35.5  | 36.1  | 35.4  | 28.3   | 28.2  | 28.4  |
|                                          | SD        | 2.6   | 2     | 2.5   | 2.2    | 2     | 1.7   |
| RBC (10 <sup>6</sup> cells/uL)           | Mean      | 8.57  | 8.22  | 8.48  | 8.58   | 8.67  | 8.48  |
|                                          | SD        | 0.41  | 0.43  | 0.48  | 0.39   | 0.24  | 0.43  |
| WBC (10 <sup>3</sup> cells/uL)           | Mean      | 1.77  | 2.89  | 3.69  | 3.05   | 2.99  | 2.6   |
|                                          | SD        | 0.69  | 1.19  | 1.46  | 2.11   | 1.52  | 0.86  |
| %Neutrophils                             | Mean      | 12    | 8.8   | 8.4   | 8.5    | 10.9  | 10.2  |
|                                          | SD        | 1.2   | 2.4   | 2.3   | 2.1    | 3     | 2     |
| %Lymphocytes                             | Mean      | 84.4  | 88.4  | 89    | 88.5   | 85.9  | 86.4  |
|                                          | SD        | 1.8   | 2.9   | 2.7   | 3.6    | 3.8   | 2.5   |
| %Monocytes                               | Mean      | 3.1   | 2.3   | 2.3   | 2.5    | 2.7   | 2.8   |
|                                          | SD        | 0.5   | 0.5   | 2.7   | 1      | 0.7   | 1     |
| %Eosinophils                             | Mean      | 0.2   | 0.1   | 0.1   | 0.2    | 0     | 0.1   |
|                                          | SD        | 0.2   | 0.3   | 0.1   | 0.3    | 0.1   | 0.2   |
| %Basophils                               | Mean      | 0.2   | 0.1   | 0     | 0.1    | 0.1   | 0.1   |
|                                          | SD        | 0.1   | 0.1   | 0.1   | 0.1    | 0.1   | 0.1   |
| Lung weight (g/100 g bw)                 | Mean      | 4.588 | 4.879 | 4.955 | 4.833  | 5.12  | 4.95  |
|                                          | SD        | 0.542 | 0.425 | 0.558 | 0.581  | 0.611 | 0.414 |
| Lung inflammation, chronic active, focal | Frequency | 0     | ND    | 0     | 1      | ND    | 1     |

Supplementary Table S5. Summary of sample information, RNA quality control, and uses thereof

| Dose level of LC28-0126 (mg/person) | Sample ID     | Age      | RNA           |           |           |      | Application <sup>2</sup> |          |          |    |
|-------------------------------------|---------------|----------|---------------|-----------|-----------|------|--------------------------|----------|----------|----|
|                                     |               |          | Conc. (ng/UL) | A260/A280 | A260/A230 | RIN  | Decision <sup>1</sup>    | Cytokine | GeneChip |    |
| 1                                   | R7201-0h      | 31       | 234.67        | 2.10      | 2.23      | 9.5  | P                        | D        | ND       |    |
|                                     | R7201-6h      |          | 26.48         | 2.35      | 1.91      | 9.1  | F                        | D        | ND       |    |
|                                     | R7202-0h      | 33       | 179.33        | 2.13      | 2.03      | 9.2  | P                        | D        | ND       |    |
|                                     | R7202-6h      |          | 28.97         | 2.14      | 0.77      | 9.5  | F                        | D        | ND       |    |
|                                     | R7203-0h      | 25       | 79.75         | 2.16      | 1.74      | 9.2  | P                        | ND       | ND       |    |
|                                     | R7203-6h      |          | 79.29         | 2.17      | 2.16      | 8.9  | P                        | ND       | ND       |    |
|                                     | R7204-0h      | 30       | 126.36        | 2.13      | 2.17      | 9.7  | P                        | D        | ND       |    |
|                                     | R7204-6h      |          | 87.04         | 2.20      | 2.14      | 9.7  | P                        | D        | ND       |    |
|                                     | R7205-0h      | 30       | 103.69        | 2.12      | 2.10      | 9.4  | P                        | ND       | ND       |    |
|                                     | R7205-6h      |          | 82.25         | 2.19      | 1.35      | 9.8  | P                        | ND       | ND       |    |
|                                     | R7206-0h      | 27       | 146.40        | 2.12      | 2.17      | 9.5  | P                        | D        | ND       |    |
|                                     | R7206-6h      |          | 121.21        | 2.18      | 2.11      | 9.6  | P                        | D        | ND       |    |
|                                     | R7207-0h      | 33       | 96.05         | 2.19      | 1.78      | 9.7  | P                        | ND       | ND       |    |
|                                     | R7207-6h      |          | 83.23         | 2.16      | 2.01      | 9.7  | P                        | ND       | ND       |    |
|                                     | R7208-0h      | 24       | 70.84         | 2.18      | 2.13      | 9.7  | P                        | D        | ND       |    |
|                                     | R7208-6h      |          | 79.80         | 2.21      | 1.39      | 9.7  | P                        | D        | ND       |    |
|                                     | R7201-7208_0h |          |               | 111.13    | 2.05      | 2.00 | 9.5                      | P        | ND       | D  |
|                                     | R7201-7208_6h |          |               | 86.53     | 2.15      | 1.84 | 9.7                      | P        | ND       | D  |
|                                     | 3             | R1201-0h | 25            | 142.07    | 2.13      | 2.19 | 7.9                      | F        | D        | ND |
|                                     |               | R1201-6h |               | 284.45    | 2.08      | 2.22 | 9.4                      | P        | D        | ND |
| R1202-0h                            |               | 22       | 320.26        | 2.08      | 2.20      | 9.0  | P                        | D        | ND       |    |
| R1202-6h                            |               |          | 303.68        | 2.07      | 2.19      | 9.4  | P                        | D        | ND       |    |
| R1203-0h                            |               | 36       | 570.67        | 2.04      | 2.05      | 8.9  | P                        | D        | ND       |    |
| R1203-6h                            |               |          | 345.98        | 2.08      | 2.21      | 9.1  | P                        | D        | ND       |    |
| R1204-0h                            |               | 22       | 387.14        | 2.08      | 2.16      | 8.0  | P                        | ND       | ND       |    |
| R1204-6h                            |               |          | 615.90        | 2.05      | 2.07      | 9.2  | P                        | ND       | ND       |    |
| R1205-0h                            |               | 28       | 511.07        | 2.03      | 2.08      | 9.2  | P                        | D        | ND       |    |
| R1205-6h                            |               |          | 363.79        | 2.08      | 2.19      | 9.3  | P                        | D        | ND       |    |
| R1206-0h                            |               | 25       | 327.26        | 2.09      | 2.28      | 9.2  | P                        | ND       | ND       |    |
| R1206-6h                            |               |          | 253.14        | 2.08      | 2.25      | 9.5  | P                        | ND       | ND       |    |
| R1207-0h                            |               | 29       | 478.68        | 2.02      | 2.05      | 9.4  | P                        | ND       | ND       |    |
| R1207-6h                            |               |          | 356.78        | 2.07      | 2.01      | 9.2  | P                        | ND       | ND       |    |
| R1208-0h                            |               | 20       | 217.80        | 2.09      | 2.27      | 9.5  | P                        | D        | ND       |    |
| R1208-6h                            |               |          | 281.43        | 2.09      | 2.07      | 9.3  | P                        | D        | ND       |    |
| R1201-1208_0h                       |               |          |               | 193.84    | 2.04      | 2.28 | 9.1                      | P        | ND       | D  |
| R1201-1208_6h                       |               |          |               | 159.71    | 2.04      | 2.20 | 9.3                      | P        | ND       | D  |
| 10                                  |               | R2201-0h | 24            | 350.36    | 2.11      | 2.26 | 9.0                      | P        | D        | ND |
|                                     |               | R2201-6h |               | 351.61    | 2.10      | 2.20 | 9.2                      | P        | D        | ND |
|                                     | R2202-0h      | 26       | 633.64        | 2.05      | 2.16      | 9.3  | P                        | D        | ND       |    |
|                                     | R2202-6h      |          | 476.95        | 2.01      | 2.10      | 9.2  | P                        | D        | ND       |    |
|                                     | R2203-0h      | 27       | 218.41        | 2.08      | 2.22      | 9.2  | P                        | D        | ND       |    |
|                                     | R2203-6h      |          | 255.80        | 2.09      | 2.11      | 9.4  | P                        | D        | ND       |    |
|                                     | R2204-0h      | 27       | 472.16        | 2.07      | 2.24      | 9.5  | P                        | ND       | ND       |    |
|                                     | R2204-6h      |          | 338.46        | 2.09      | 2.24      | 9.1  | P                        | ND       | ND       |    |
|                                     | R2205-0h      | 23       | 299.95        | 2.10      | 2.26      | 8.8  | P                        | D        | ND       |    |
|                                     | R2205-6h      |          | 245.46        | 2.12      | 2.24      | 9.2  | P                        | D        | ND       |    |
|                                     | R2206-0h      | 26       | 368.61        | 2.08      | 2.24      | 9.2  | P                        | D        | ND       |    |
|                                     | R2206-6h      |          | 212.27        | 2.13      | 2.19      | 9.0  | P                        | D        | ND       |    |
|                                     | R2207-0h      | 24       | 396.90        | 2.09      | 2.04      | 8.8  | P                        | ND       | ND       |    |
|                                     | R2207-6h      |          | 407.10        | 2.08      | 2.25      | 7.7  | F                        | ND       | ND       |    |
|                                     | R2208-0h      | 24       | 315.50        | 2.10      | 2.24      | 8.9  | P                        | ND       | ND       |    |
|                                     | R2208-6h      |          | 330.65        | 2.11      | 1.39      | 9.1  | P                        | ND       | ND       |    |
|                                     | R2201-2208_0h |          |               | 192.46    | 2.05      | 2.24 | 9.1                      | P        | ND       | D  |
|                                     | R2201-2208_6h |          |               | 188.61    | 2.06      | 2.05 | 8.9                      | P        | ND       | D  |
|                                     | 25            | R3201-0h | 28            | 441.16    | 2.09      | 1.46 | 9.6                      | P        | D        | ND |
|                                     |               | R3201-6h |               | 274.19    | 2.10      | 2.26 | 9.5                      | P        | D        | ND |
| R3202-0h                            |               | 25       | 253.82        | 2.07      | 2.18      | 9.3  | P                        | ND       | ND       |    |
| R3202-6h                            |               |          | 185.52        | 2.13      | 2.09      | 8.9  | P                        | ND       | ND       |    |
| R3203-0h                            |               | 25       | 295.69        | 2.11      | 2.13      | 9.1  | P                        | D        | ND       |    |
| R3203-6h                            |               |          | 212.61        | 2.11      | 0.90      | 9.5  | P                        | D        | ND       |    |
| R3204-0h                            |               | 28       | 224.09        | 2.10      | 2.17      | 9.2  | P                        | ND       | ND       |    |
| R3204-6h                            |               |          | 189.15        | 2.09      | 1.99      | 9.0  | P                        | ND       | ND       |    |
| R3205-0h                            |               | 20       | 194.28        | 2.12      | 2.23      | 9.0  | P                        | D        | ND       |    |
| R3205-6h                            |               |          | 259.74        | 2.08      | 2.21      | 9.5  | P                        | D        | ND       |    |
| R3206-0h                            |               | 24       | 170.84        | 2.12      | 2.19      | 9.3  | P                        | ND       | ND       |    |
| R3206-6h                            |               |          | 156.70        | 2.10      | 2.23      | 9.0  | P                        | ND       | ND       |    |
| R3207-0h                            |               | 31       | 241.10        | 2.10      | 2.24      | 9.5  | P                        | D        | ND       |    |
| R3207-6h                            |               |          | 228.71        | 2.08      | 2.13      | 9.3  | P                        | D        | ND       |    |
| R3208-0h                            |               | 27       | 252.14        | 2.11      | 2.22      | 9.5  | P                        | D        | ND       |    |
| R3208-6h                            |               |          | 193.39        | 2.09      | 2.20      | 8.9  | P                        | D        | ND       |    |
| R3201-3208_0h                       |               |          |               | 173.95    | 2.03      | 2.02 | 9.3                      | P        | ND       | D  |
| R3201-3208_6h                       |               |          |               | 174.29    | 2.06      | 1.81 | 9.4                      | P        | ND       | D  |

<sup>1</sup>P: Passed, F: Failed<sup>2</sup>D: Determined, ND: Not determined

Supplementary Figure 1 (A)

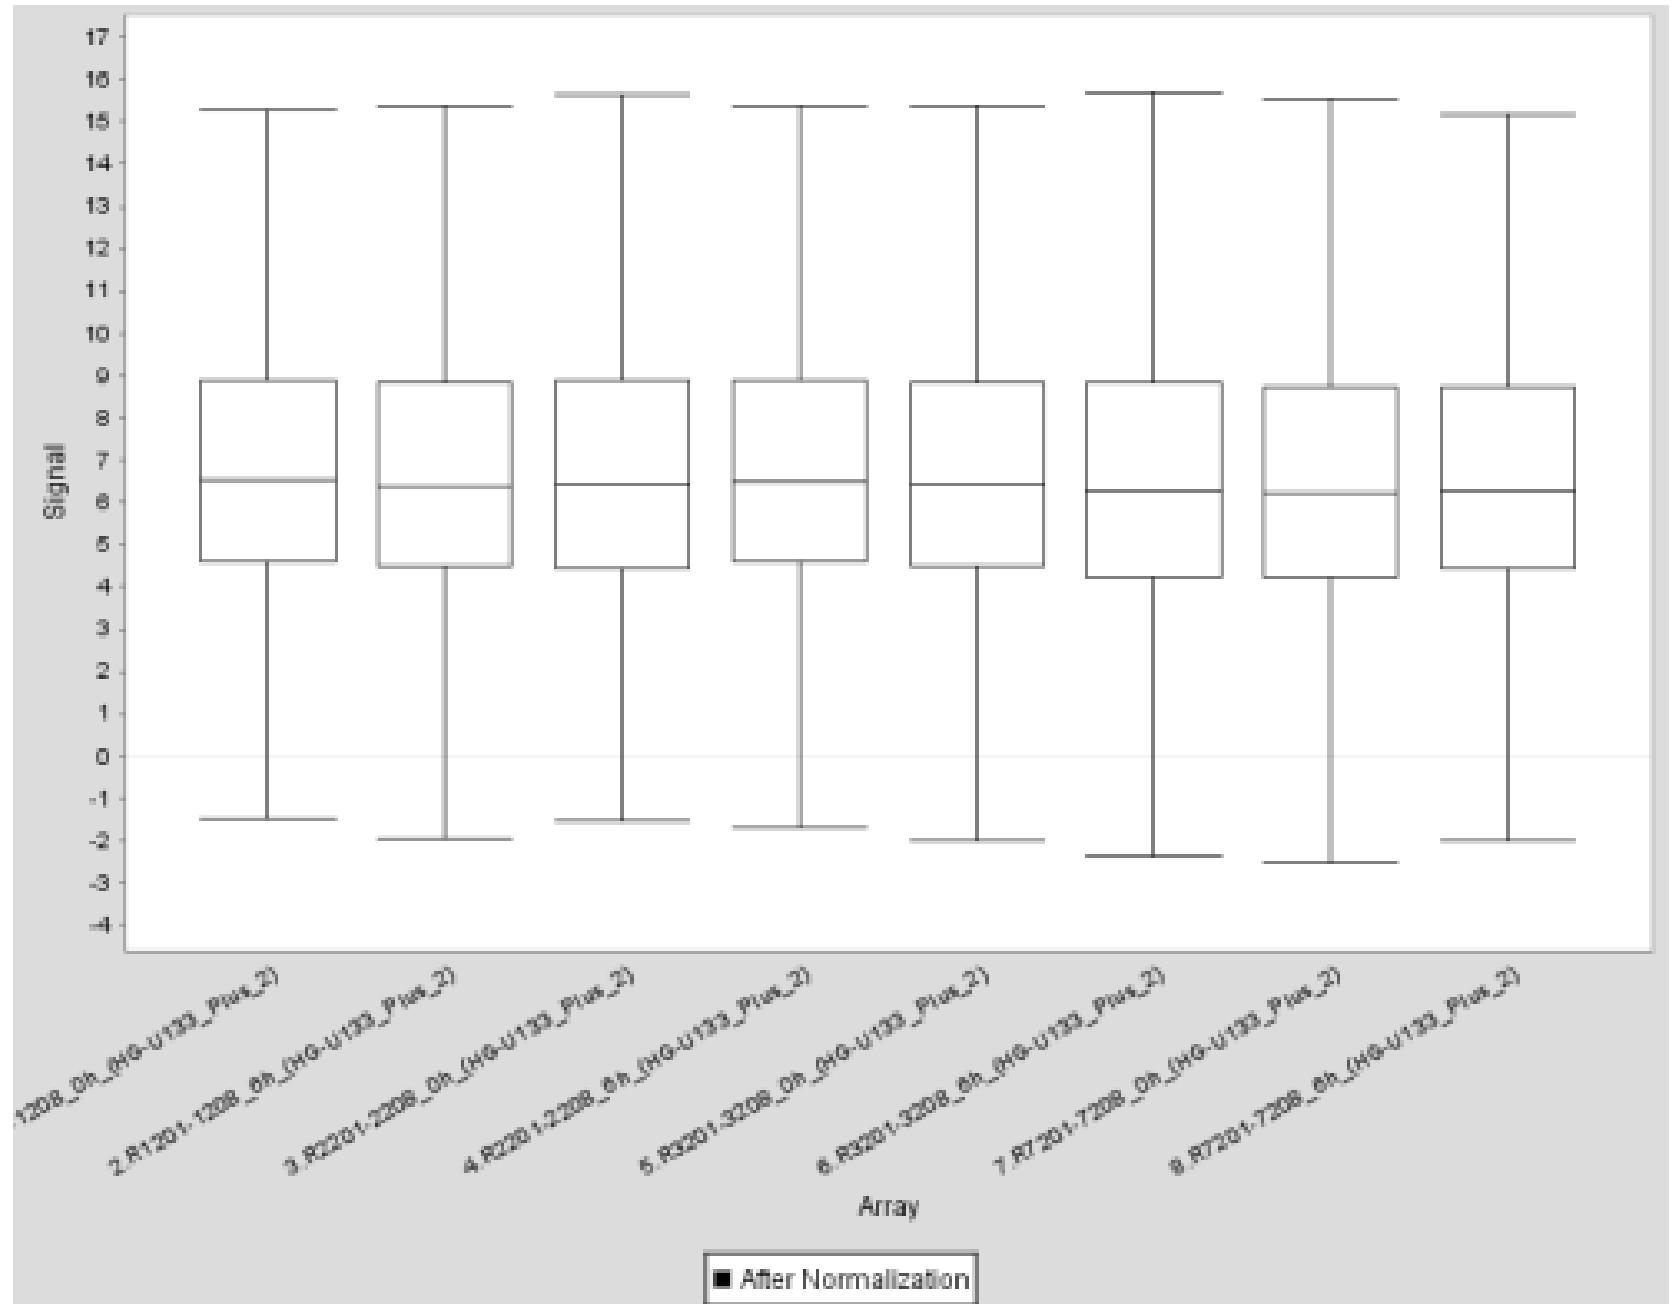



Supplementary Figure 1 (B)

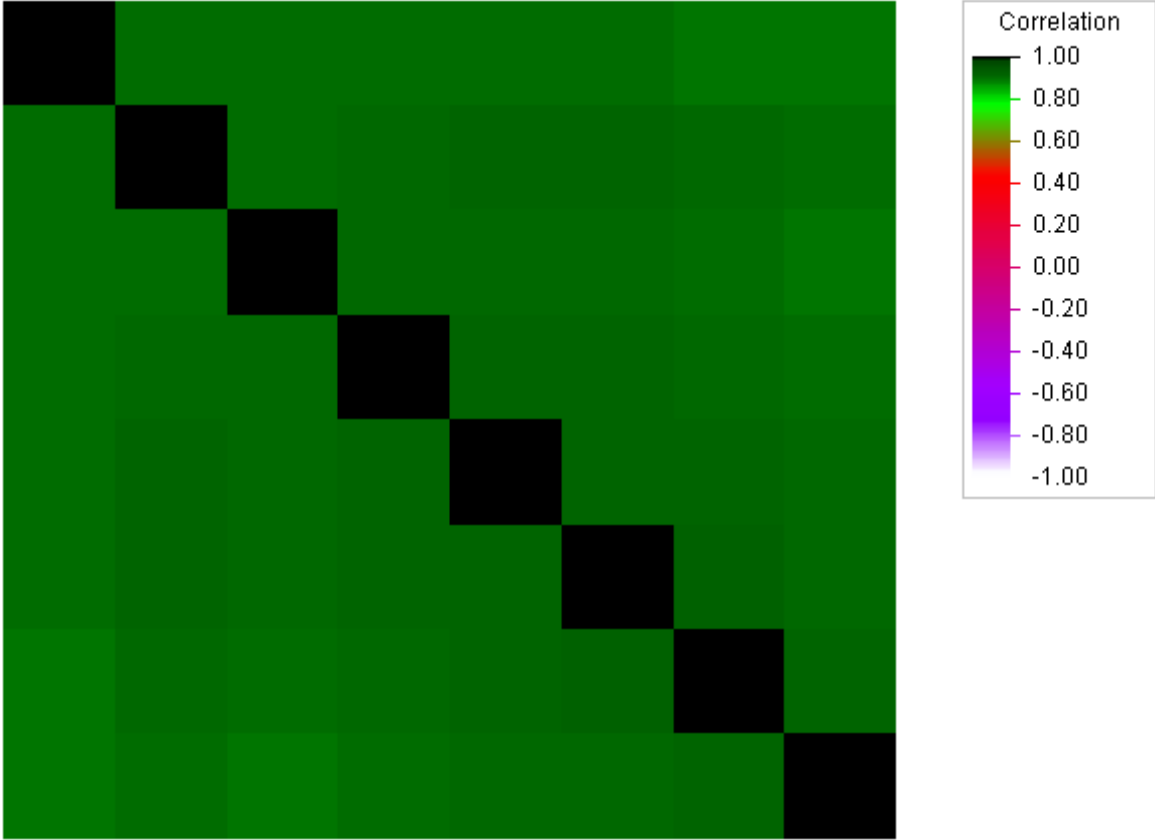

# Supplementary Figure 1 (C)

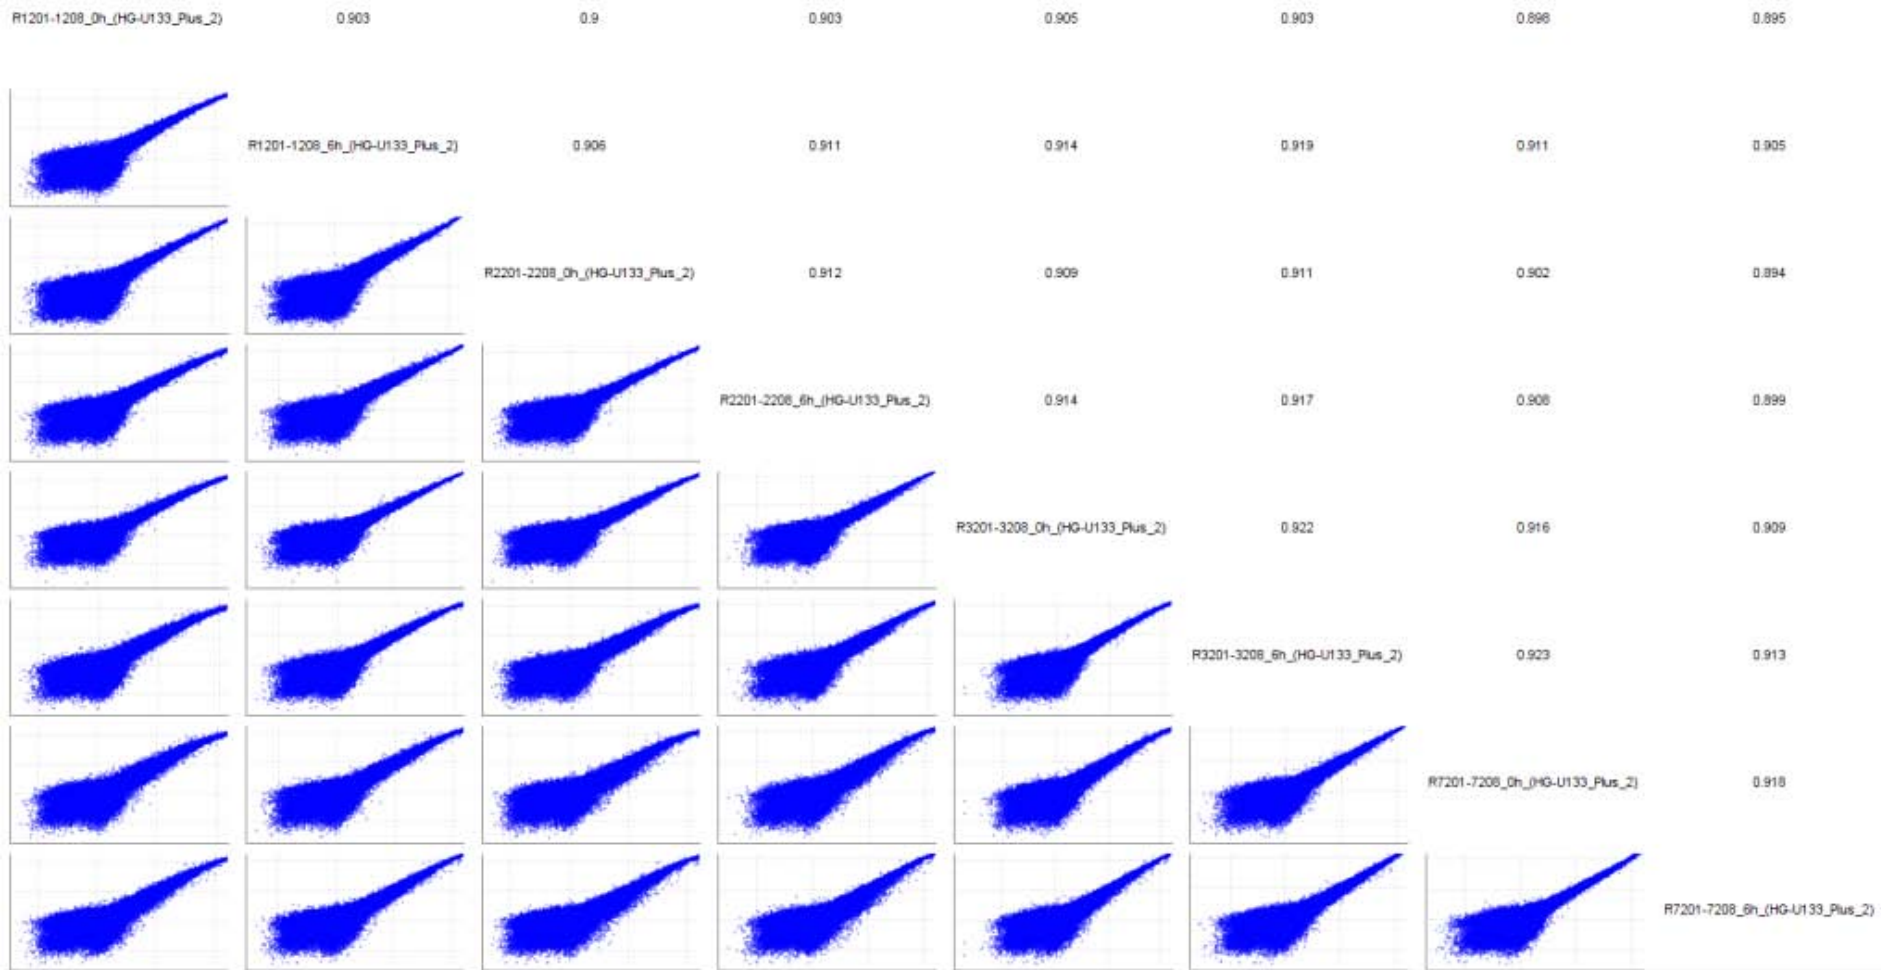

Supplement: srep17784-s1.pdf [file srep17784-s1.pdf]
